# Supplementary material
Source: ML conference proceedings conference paper supplement (https://openreview.net/forum?id=T7tfgX37ql)
Supplement: supplementary_material [file attachment]

## CHAT

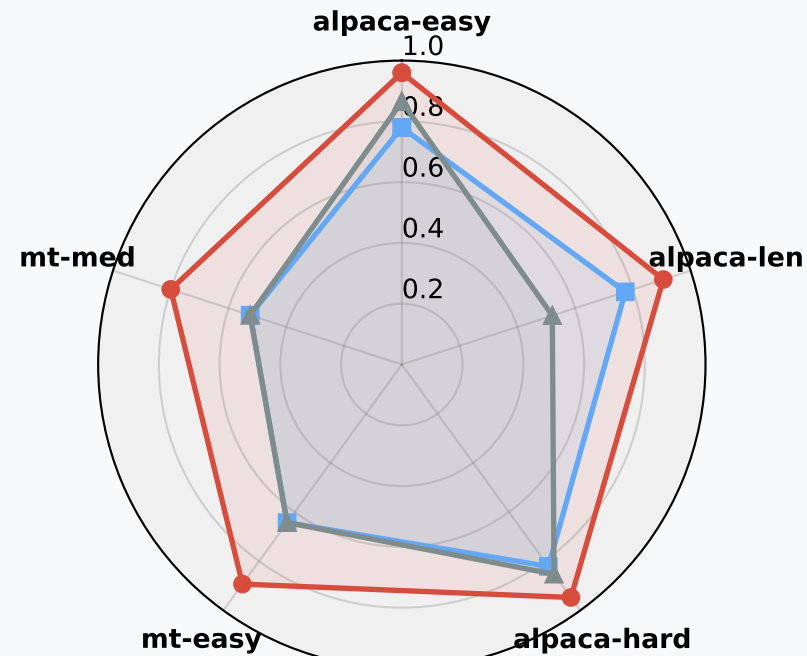

LLM-as-Judge: 0.919  
Program-as-Judge: 0.750  
Base Model: 0.715

## CHAT-HARD

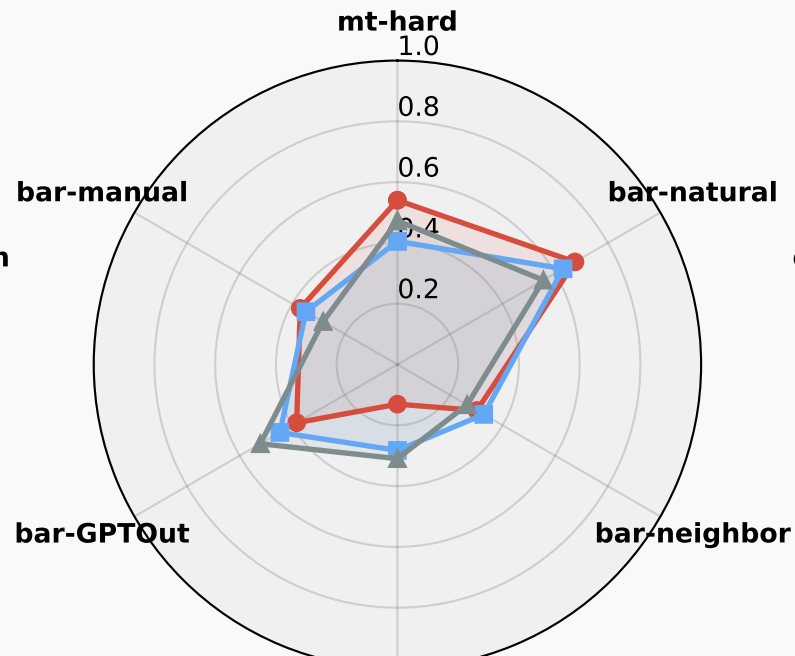

LLM-as-Judge: 0.384  
Program-as-Judge: 0.406  
Base Model: 0.383

## SAFETY

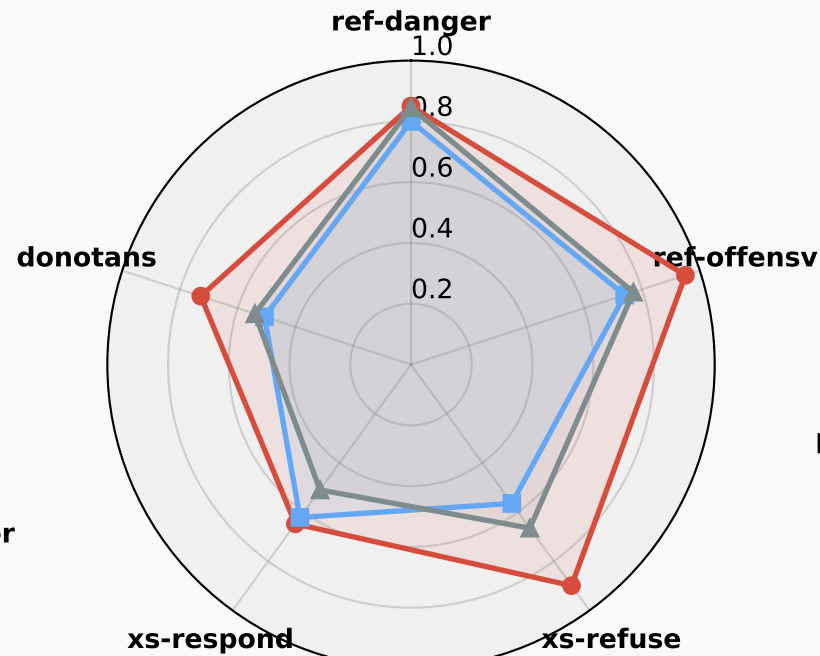

LLM-as-Judge: 0.816  
Program-as-Judge: 0.622  
Base Model: 0.649

## REASONING

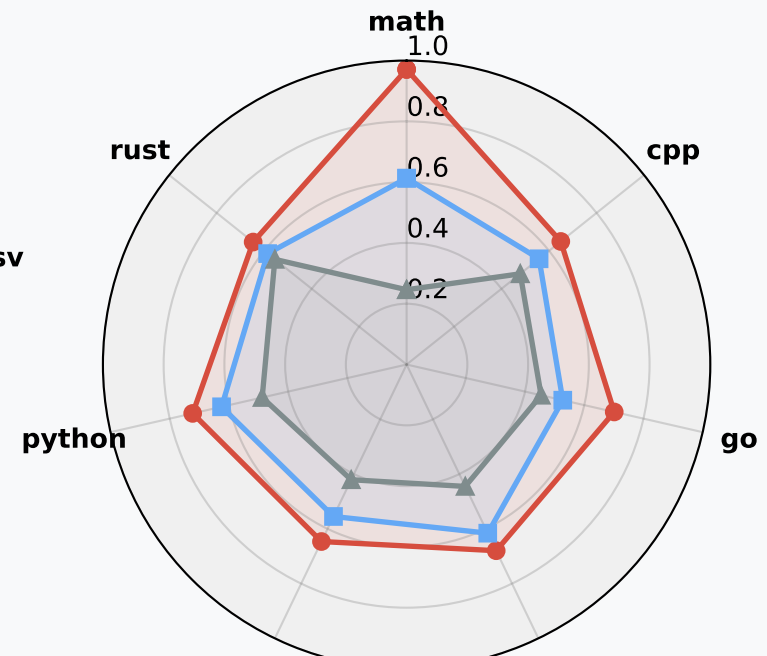

LLM-as-Judge: 0.823  
Program-as-Judge: 0.595  
Base Model: 0.360

LLM-as-Judge Program-as-Judge Base Model
