# Supplementary material
Source: ML conference proceedings conference paper supplement (https://openreview.net/forum?id=T7tfgX37ql)

# CHAT

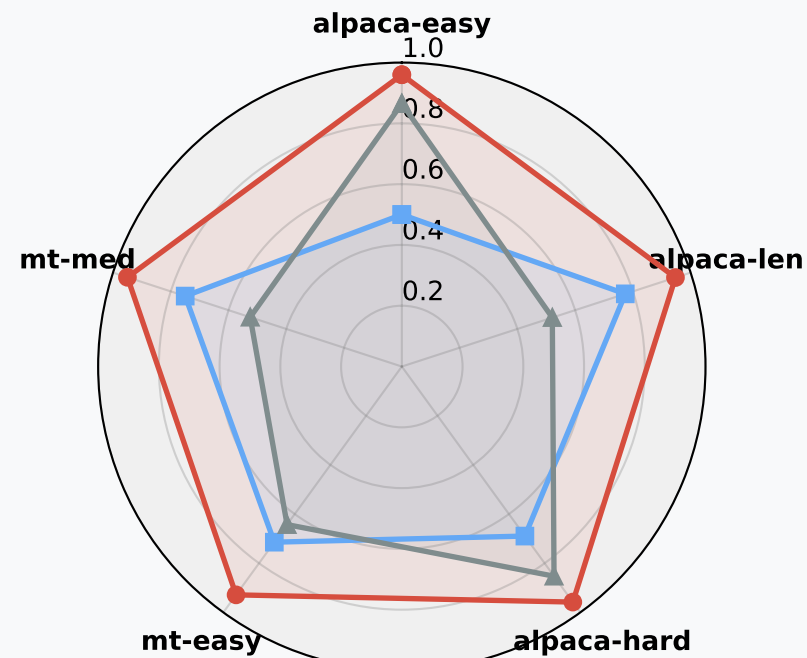

LLM-as-Judge: 0.953  
Program-as-Judge: 0.668  
Base Model: 0.715

# CHAT-HARD

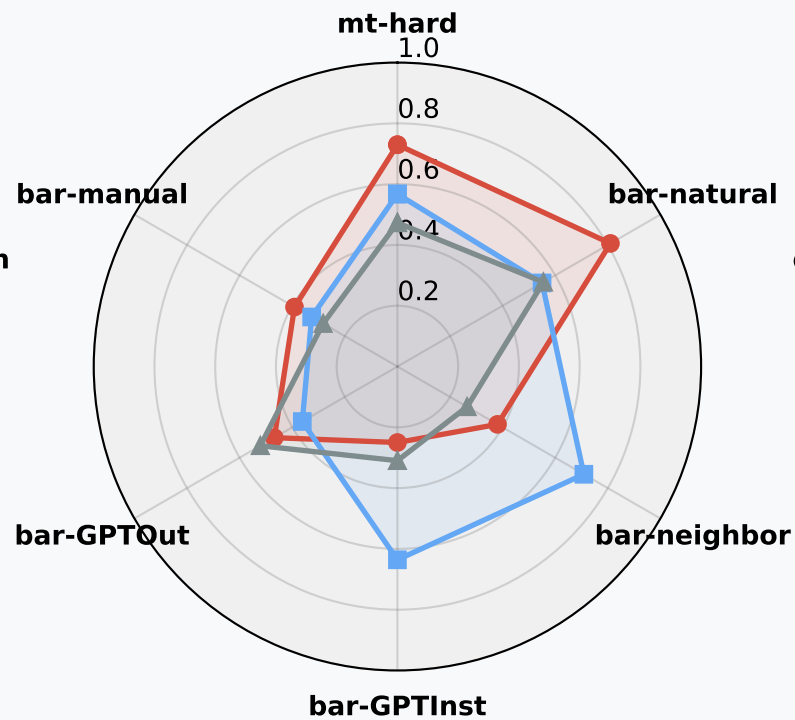

LLM-as-Judge: 0.487  
Program-as-Judge: 0.573  
Base Model: 0.383

# SAFETY

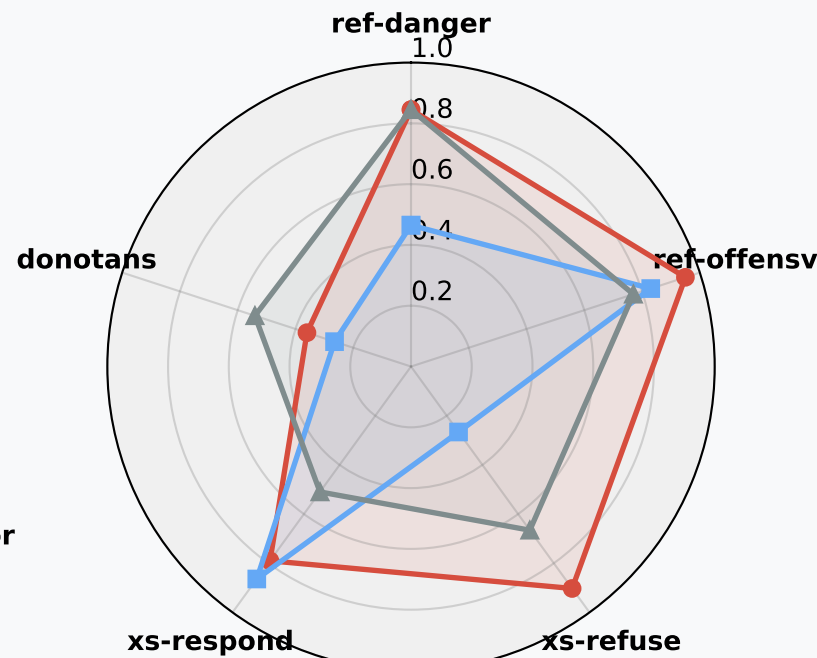

LLM-as-Judge: 0.778  
Program-as-Judge: 0.493  
Base Model: 0.649

# REASONING

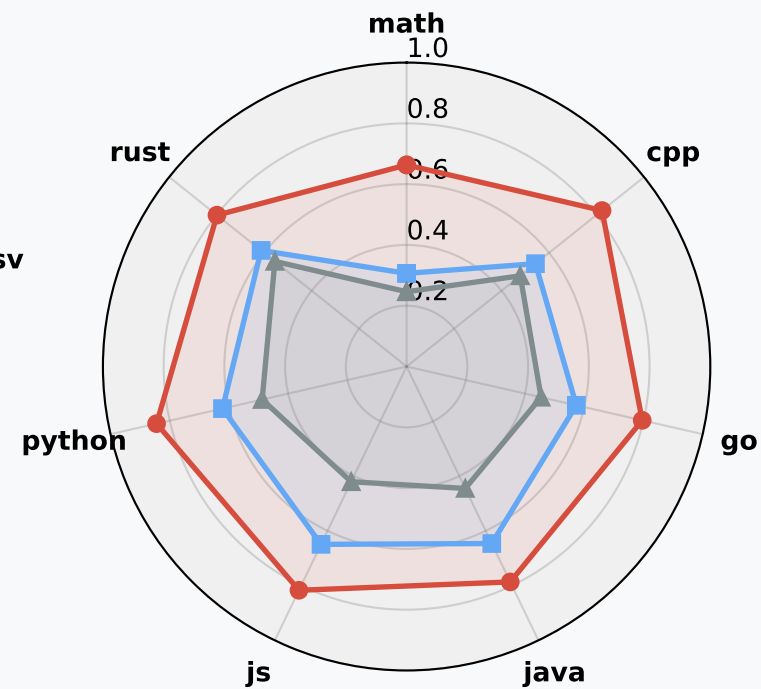

LLM-as-Judge: 0.737  
Program-as-Judge: 0.457  
Base Model: 0.360

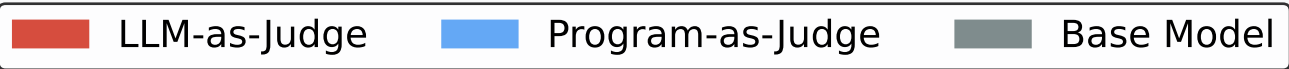

Supplement: supplementary_material [file attachment]
