# Supplementary material
Source: ML conference proceedings conference paper supplement (https://openreview.net/forum?id=T7tfgX37ql)

# JudgeLM Dataset

Max: 0.756

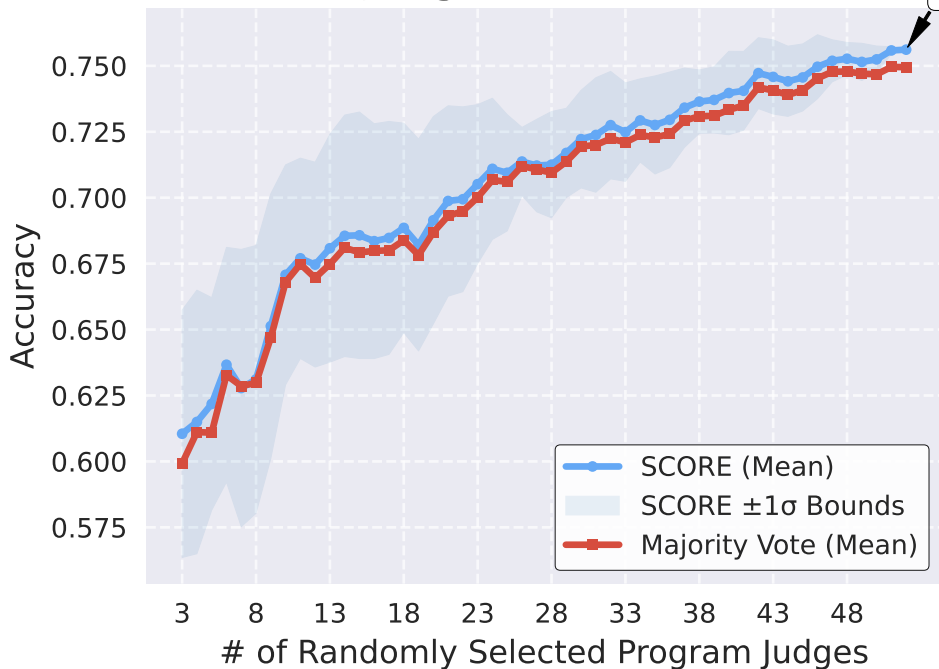

Supplement: supplementary_material [file attachment]

# Prometheus

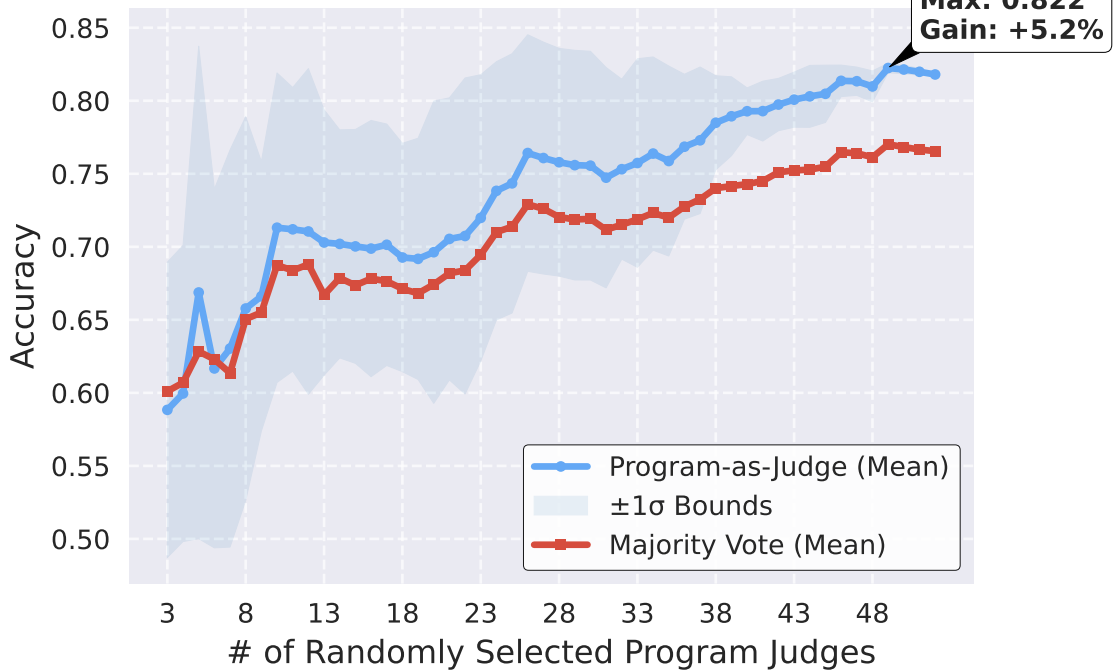

Supplement: supplementary_material [file attachment]
